# Supplementary material
Source: Springer Nature journal article supplement (https://www.springermedizin.de/resource/supplementary/12885_2011_3019_MOESM7_ESM.pdf/9462500)

**HT29****SW707**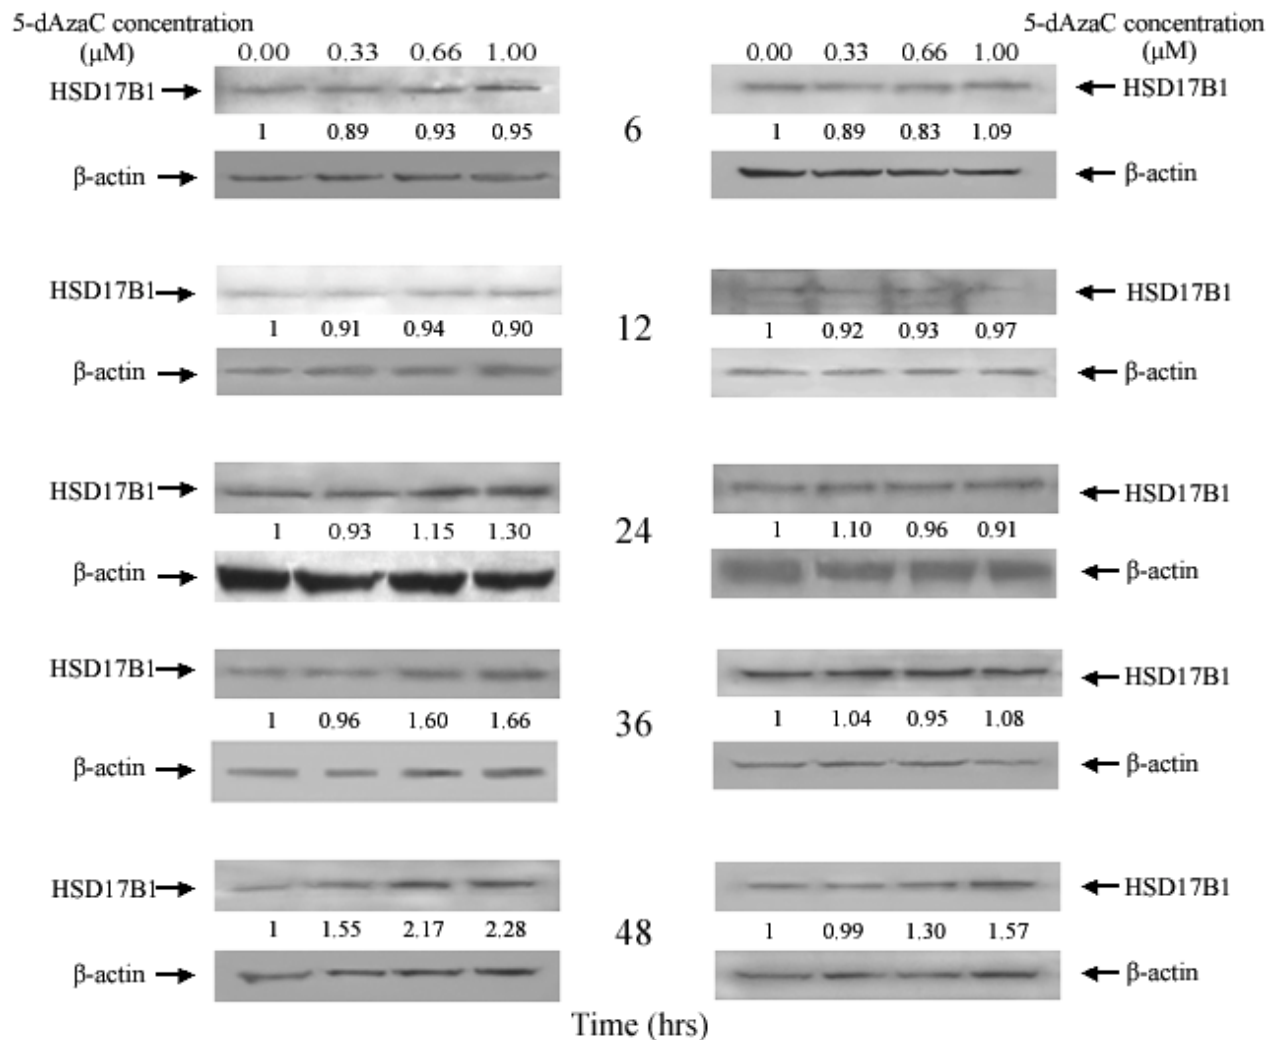

Supplement: MOESM7 [file 9462500]
